# Supplementary material for: Quantile Sampling: a robust and simplified pixel-based multiple-point simulation approach
Source: Copernicus journal article supplement (doi:10.5194/gmd-2019-211), 2019-11-22
Supplement: Supplementary file [file gmd-2019-211-AC1-supplement.pdf]

1 Reply to Reviewer 1 (Prof. Ute Mueller)

2 The paper describes a new algorithm for multiple point simulation of continuous and  
3 discrete spatial variables. To start with a short review of the various types of MPS algorithms  
4 is provided, which distinguishes patching from pixel based approaches. The algorithm  
5 described here falls into the second category. Shortcomings of the method are discussed  
6 briefly, including the need for a threshold and sensitivity of the simulation quality to this  
7 threshold, but which can also lead to very long simulation times. In this paper the authors  
8 exploit a decomposition of the distance measures to apply FFT to speed up computation of  
9 mismatch maps with the aim to more quickly identify candidate patterns in the training  
10 image, which may be complete or incomplete. The use of the FFT to compute the mismatch  
11 map is attractive in that it is fast to compute irrespective of dimension.

12 We thank Prof. Ute Mueller for her feedback and interest in our work

13 The mismatch map is calculated by computing for each pair  $(s, t)$  a dissimilarity measure  
14 where  $t$  belongs to the training image and  $s$  to the conditioning set. It is this dissimilarity  
15 measure which is then identified in terms of cross correlation. The authors provide a  
16 description of the metrics applied and a rewrite of the metrics in terms of cross correlations,  
17 and while the reader gets a general idea as to what is being calculated the derivation is  
18 patchy and somewhat sloppy in that summation indices are missing and critical steps are  
19 not described satisfactorily, such as the derivation of equation 9, which introduces cross  
20 correlations.

21 We will complete the notations by adding summation indices in all equations. The derivation  
22 of equation 9 will be described in an appendix.

23 Also, is it correct to assume that “ $l$ ” is a grid operator?

24  $l$  represents lag vectors. Therefore, here it represents displacement on the grid. We will add  
25 a clarification about it in the manuscript.

26 Once the mismatch map is computed, the  $k$  best matches are identified and a sample is  
27 drawn at random from this pool. The possibility of having non-integer values for  $k$  is touched  
28 upon, and allow unequal weighting of the first  $\text{ceil}(k)$  candidates, with the first  $\text{floor}(k)$   
29 candidates equally likely and the final candidate less likely (probability of being chose):  $1 -$   
30  $\text{floor}(k)/k$ . The main advantage appears to lie in being able to choose between 2 instead of  
31 just one candidate (case of  $k$  between 1 and 2)

32 We agree with the reviewer. Another advantage we see is that it provides an equivalence  
33 between QS and the DS approach, allowing for benchmarks. In fact, DS with a threshold of  $t=0$   
34 and a scanning fraction of  $f=1/k$  can be seen as equivalent to QS. A discussion on this will be  
35 added to the manuscript.

36 Simplifications and computational implementation details for speeding up the computation  
37 are discussed reasonably thoroughly and provide other practitioners with useful  
38 suggestions on how to potentially improve the efficiency of their own MPS algorithms. The  
39 proposed algorithm is benchmarked by means of standard sample data sets and a sensitivity  
40 analysis is provided demonstrating that QS performs well subject to the choice of a suitable

41 **kernel and that the quality of QS simulations is similar to that of DS simulations. It would**  
42 **have been interesting to see an exploration of kernels other than one of Gaussian type.**

43 While we agree that a full exploration of kernel possibilities would be interesting, it will be the  
44 subject of a future paper.

45 To be more precise about this point, preliminary experimentations on various kernel radial  
46 designs have shown that it is not straightforward to define general guidelines for an optimal  
47 kernel. Figure 1 below shows some of these preliminary results, where exhaustive kernel  
48 parameter exploration is carried out and identifies areas of higher performance in terms of  
49 reproducing variogram and connectivity function. While it is clear that some kernel functions  
50 perform better than others, it seems that the results are highly specific to the type of patterns  
51 to reproduce and should be further investigated.

52 Furthermore, tests using non-parametric kernels show a potential for future improvements.  
53 However, substantial future research is still needed on this topic, which will be the object of a  
54 future publication.

55  
56

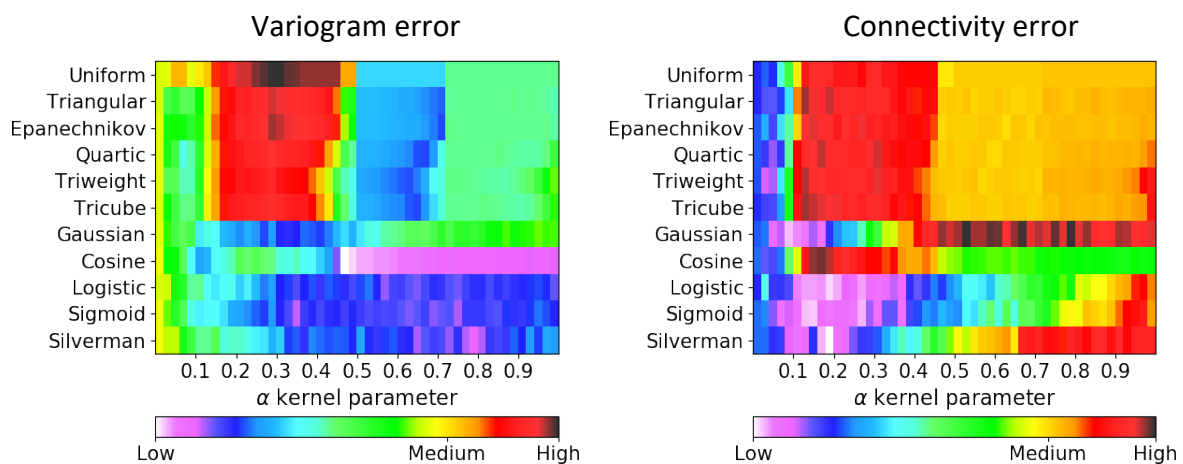

57  
58

Figure 1 Errors for different types of radial kernel based on the stone image.

59 In addition, our formulation may have been unclear, in the sense that the kernel used in this  
60 manuscript has an exponential form and not Gaussian (the notation  $\|\cdot\|_2$  denotes the  $L_2$  norm  
61 and not its squared form in equation 16) . We will clarify this point to make the paper easier  
62 to read.

63 **Also, the metrics being used to assess the performance would benefit from going beyond**  
64 **variograms and connectivity (I acknowledge that the Euler characteristic was also used, but**  
65 **what good is it without a definition? Reference to another paper is all fine and well, but a**  
66 **definition and an explanation of what it measures would have been nice.)**

67 As advised, we will add some brief explanation in the paper about the Euler characteristic and  
68 connectivity metrics ~lines 385-391.

69 **It would be really nice to see an evaluation in terms of a multipoint statistics.**

70 To address this comment, we will carry out a validation of our realizations in terms of the  
71 reproduction of higher-order statistics, using cumulants as a metric. Another possibility would  
72 be the use of multiple-point histograms, but we refer not to use them because their  
73 interpretation can be very difficult, and moreover are possible only for categorical variables.

74 **Please amend all the formulae to ensure summation indices are clear, eg: Line 149: It is not**  
75 **clear over what is summed in equation 1.**

76 Unfortunately, in Equation 1, line 149, it is impossible to know in advance the number of  
77 elements or the set for the summation. The description is really generic here and needs to be  
78 adapted for each required metric as shown for the  $L_2$  and Hamming metrics. However, we will  
79 add and define proper ensemble for each summation to help the reader.

80 **You clarify this to some extent below in lines 150 to 183, but I find this a little unsatisfying**  
81 **Line 174: The description preceding equation 2 talks about vectors, but the formula seems**  
82 **to be univariate.**

83 We agree this is unclear as the “vector” in line 172, was referring to the origin of the Hamming-  
84 distance. We will rephrase this sentence to remove any confusion for the audience as  
85 following.

86 **If you have c categories, is “a” a vector with c entries or simply one of the values from 1 to**  
87 **c if you label the categories in that manner?, It looks to me that “a” is simply a category ...**  
88 **so looking at the equation, it would seem that it is equal to c, if “a” and “b” are distinct and**  
89 **equal to c-1 if they are equal, while the sum on the right is equal to 1 if “a” and “b” are equal**  
90 **and 0 else. There are also brackets missing in the middle expression (you should have**  
91  **$\sum_{j \in C} (1 - \delta_{aj}) \delta_{bj}$ )**

92 The description with categorical cases described by the reviewer is correct (and we don’t need  
93 to number from 1 to c, and it is not the case in the implementation either). However, a mistake  
94 sneaked in, and we thank the reviewer for spotting the error of the equation 3. Indeed. It  
95 should be:  $1 - \sum_{j \in C} (\delta_{a,j} \cdot \delta_{b,j})$  and not  $\sum_{j \in C} 1 - (\delta_{a,j} \cdot \delta_{b,j})$ . Therefore, now equation 3 is:

$$96 \quad \epsilon_{L^0}(a, b) = 1 - \sum_{j \in C} \delta_{a,j} \cdot \delta_{b,j} \propto \sum_{j \in C} \delta_{a,j} \cdot \delta_{b,j}$$

97 The linear transformation between both sides of the proportional symbol is  $y=ax+b$ , with  $a=-$   
98  $1$ , and  $b=1$ .

99 **Line 200: N(t) is not just a location but a neighbourhood?**

100  $N(t)$  is indeed a neighborhood. We agree line 203 can be ambiguous, and we will rephrase it  
101 as follows: where  $N_l(p)$  represents the neighbor value (or vector) at the position  $p + l$ , ( $p$  can  
102 represent either  $s$  or  $t$ )

103 **Please clarify Line 230: define the cross-correlation operator. Also,  $T_i$  has not been defined.**  
104 **You identify “\*” with convolution and then apply the convolution theorem. Provide a**  
105 **derivation that this is true in an appendix.**

106  $\star$  represents the cross-correlation and therefore the “convolution theorem” is applied as  
107 follows:  $\mathcal{F}(x \star y) = \overline{\mathcal{F}(x)} \circ \mathcal{F}(y)$ , contrarily to a convolution  $*$  where we get  $\mathcal{F}(x * y) =$   
108  $\mathcal{F}(x) \circ \mathcal{F}(y)$ . A clarification will be added and  $T_i$  will be properly defined.

109 **There are also some typos in the figure captions**

110 Captions will be checked and corrected in consequence.

111

112 Response to Reviewer 2 (Prof. Thomas Mejer Hansen)

113 The authors present a novel multiple point statistical simulation algorithm that works for  
114 both discrete and continuous data, that scales well on parallel computing architectures, and  
115 that is available as open-source C++ code (G2S) with interfaces in Matlab, Python and R.

116 At the core of the method is the use of convolution to very efficiently compute to compute  
117 a mismatch, between a conditional event (consisting of the 'N' closest hard/simulated data)  
118 centered at all locations in the TI (except near the boundaries) (2.3) Then the authors  
119 suggest to simulate the current pixel based on a random selection between the 'k' centered  
120 pixel values associated with the smallest mismatch (2.4)

121 This leads to an algorithm with only two main 'tuning parameters'. The algorithm is in-itself  
122 novel and has obvious potential for used instead of some of the currently widely used MPS  
123 methods. The examples in the manuscript nicely describe the potential uses. In addition,  
124 the way the algorithm has been implemented should be applauded, as it is available as Open  
125 Source code that can be used with ease ranging from a case of "running on a single thread  
126 on a laptop in python/Matlab", to "running remote on a large cluster". This makes the code  
127 very versatile.

128 Therefore I find the manuscript highly appropriate for publication.

129 Thanks a lot for the positive feedback!

130 I have one major comment, that relate to the name of the algorithm and the way a pixel  
131 value is chosen based on 'k' smallest values of E/mismatch. The authors refer to these 'k'  
132 smallest values of E as a "quantile" and call the algorithm, for quantile sampling. This I do  
133 not understand and find a bit misleading. How can this represent a quantile? I think the term  
134 'threshold' would be more fitting than 'quantile'.

135 The question of the algorithm name is something that has been extensively discussed  
136 between authors. We believe that the use of the term "threshold" would bring confusion with  
137 the Direct Sampling algorithm, which uses a threshold in the error.

138 One name that was originally discussed for our algorithm is "Quick Sampling". According to  
139 the justified comment by the reviewer, we propose to use this name as a replacement, as it  
140 allows keeping the acronym "QS" with which users are familiar.

141 The use of the term "quantile" suggests that the selection of the new pixel value is based of  
142 a probabilistic measure. Also, say 'k=18', and for a discrete case only 9 pixel values are  
143 associated with a mismatch of '0'. Why would one want to use the same probability  
144 ( $P=9/18$ ) to select one of these, as opposed to one of the pixel values associated with a non-  
145 perfect match ( $P=9/10$ )? Or more extreme, say that pixel associated with the 18th best  
146 mismatch has a mismatch of 10 pixels. Why would one want to assign the same probability  
147 ( $1/18$ ) to this, as to the pixels with a mismatch of 0? The use of the 'k'-'threshold' is  
148 convenient, but to me it makes the method less clear to describe in terms of the implied  
149 statistical assumptions. Some discussion on 'quantile' vs 'threshold' would be good.

150 This hypothesis is similar to the use of a distance threshold in DS and should indeed be  
151 discussed. k in QS is statistically similar to DS with a threshold at 0 and a fraction  $f=1/k$  (this is  
152 one of the reasons for using decimal values for k) under the hypothesis of stationarity.

153 This equivalence will be discussed in section 2.4, to allow readers to get a better feeling about  
154 the relation between QS and DS, and the utility of non-integer values of k.

155

156 The question of the reviewer could be turned around “why to not using the best candidate  
157 (k=1)?”. The main answer is to limit verbatim copy, because the random selection between  
158 candidates with similar mismatch (algorithm presented in Appendix A.1) significantly limits  
159 this problem in cases of a training image with replicated patterns. The problem remains for  
160 other images, and especially continuous variable images where there exist often few  
161 replicated patterns.

162 **Some comments to the text:**

163 **Line 150: Here ‘a’ and ‘b’ are referred to as “univariate pixel values”. It seems ‘a’ and ‘b’ has**  
164 **a different meaning in line 174 (eqn 3)? Here they seem to represent vectors?**

165 “a” and “b” represent each time one possible class. This section will be corrected and clarified  
166 to remove this ambiguity, also according to the comments by reviewer 1.

167 **Line 185, Eqn 5: Please elaborate a bit on how this allows mixing discrete and continuous**  
168 **variables calculating the mismatch? It seems nontrivial to compute the mismatch between**  
169 **for example a velocity of 2.1 km/s and a “lithology of type A” to a velocity of 2.13 km/s and**  
170 **“lithology of type C”?**

171 The task of combining continuous and categorical variables is indeed challenging, and has  
172 been so for all MPS approaches. From the literature and practical use of the software, we  
173 know that this problem is general to most MPS methods and that many strategies can be used.  
174 One can use a different distance threshold for each variable (as done in the DEESSE  
175 implementation), or a linear combination of the normalized errors (as done in the DS  
176 implementation). Here we use the second approach, taking advantage of the linearity of the  
177 Fourier transform. If the relative importance can be set in the “ $f_i$ ” or “ $g_i$ ” functions in equation  
178 1, it is computationally advantageous to use the kernel weights such as to have standard  
179 functions for each metric.

180 If the task of setting such variable-dependent parameters is complex, one can use the results  
181 of recent research to identify the optimal parameterization using stochastic optimization  
182 approaches, as in (Baninajar et al.), which can and has been applied on QS. This discussion will  
183 be added in the revised manuscript.

184

185 Baninajar, E., Sharghi, Y. & Mariethoz, G. MPS-APO: a rapid and automatic parameter  
186 optimizer for multiple-point geostatistics. *Stoch Environ Res Risk Assess* 33, 1969–1989  
187 (2019). <https://doi.org/10.1007/s00477-019-01742-7>

188 **Figure 1: What do the red dots in the middle small figure?**

189 We will add to the caption that the pink pixels represent missing data.

190 **Line 287: Please explain clearly what is meant by “verbatim copy”. The term is used several**  
191 **places without a proper definition.**

192 A short explanation and a reference will be added to clarify the meaning of verbatim copy.

193 **Line 338: Please explain “NUMA-aware” or provide a reference.**

194 NUMA stands for “Non-Uniform Memory Access” and refers to memory communication  
195 between many CPU sockets (such as bi-Xeon). This connection has a limited bandwidth and  
196 therefore minimizing the communication on it can significantly increase the speed of the

197 algorithm on such architectures. This can have a huge impact when running on workstations  
198 or clusters computers. A reference about this will be added.

199 **Line 392: What is meant by “..enables adaption of the parameterization. . .”?**

200 Here we mean that it allows fine-tuning the parameterization. It will be clarified in the revised  
201 manuscript.

202 **Figure 5: Please help the reader here: is Qs with a kernel better than QS with no kernel? I**  
203 **am not sure what the figure tells us?**

204 We agree that these figures are currently not very well explained and that the text describing  
205 them can be improved. We will do this by merging figures 5 and 6 and adding comments.  
206 These figures mean to convey the message that the patterns are well reproduced in all  
207 approaches, however QS presents a better reproduction of the metrics

208 **Line 399, Figure 6: Perhaps you could elaborate a little bit on “Euler characteristic” and**  
209 **whether it is a problem what Figure 6 shows?**

210 It will be added, also according to the comment by reviewer 1, by extending the description  
211 of the metrics.

212 **Figure 8: I need some help appreciating how Figure 8 suggests that the use of alpha is useful?**

213 We agree that this figure does not illustrate very well the use of the alpha parameter.  
214 However, over many tests, and as confirmed by feedback of early users, this parameter does  
215 allow a fine tuning of the simulation and is therefore an interesting tool, especially for  
216 conditional simulations with an exhaustively informed covariable. The goal here is to make  
217 the reader aware of this possibility. We will therefore change figure 8 to better show the  
218 sensitivity to alpha, possibly using a different case study.

219 **Figure 9: Please show the ‘dots’ (the actual CPU time measurements) in the figures. Is it fair**  
220 **to say that the main limitation of the using QS is the size of the training image?**

221 The “dots” will be added. We agree that the main limitation of QS is the TI size because its  
222 relation to computing time evolves in  $O(n \cdot \ln(n))$  due to the FFT computation. If solutions such  
223 as window convolution exist (often used in audio processing), in our tests the improvements  
224 are only noticeable for huge TIs. While such approaches do bring an improvement and tend  
225 to reduce the memory footprint, they also add significant complexity to the algorithm for a  
226 minor gain. Over the last decade, convolution techniques have been substantially improved,  
227 driven by the needs of Convolutional Neural Networks, but are often applied to small matrices  
228 (e.g. 3x3, 5x5, or 7x7). Other solutions are available to increase the speed of the convolution  
229 such as GPUs or FPGAs that we are still investigating.

230 Note that a dedicated CUDA implementation of QS is available in our repository, but it is still  
231 work in progress and at this stage we prefer not to include a detailed description of it in the  
232 paper.

233 **Lines 466-472. It is nice that one can choose to use many conditional point with not extra**  
234 **CPU costs. one could though argue that sometimes it is convenient in other MPS methods**  
235 **(SNESIM/IMPALA/DS) that the simulation becomes MUCH faster if one uses few**  
236 **conditioning data. If you would want to simulate with fewer conditioning data, QS would**

237 **not lead to faster CPU time.. Just to say that the advantage you describe, could in a specific**  
238 **context, be seen as the opposite.**

239 We completely agree with this point. However, the current trend in the field is to reduce the  
240 simulation quality in order to gain in time or memory space. The point here was to explain  
241 that whatever the parameterization (and quality), the computation time is identical.  
242 Therefore, it is better to choose parameters yielding a good quality simulation.

243 This is an important discussion point: QS will be fast with a small image, whereas for  
244 (SNESIM/IMPALA) it is only partially true because of the overhead related to the creation of  
245 the list/tree. Similarly, QS is insensitive to the complexity of the training image (number of  
246 patterns available), whereas SNESIM/IMPALA/DS are highly sensitive to it. QS is therefore  
247 more adapted to TIs with complex features and few repetitions. We however agree that  
248 SNESIM/IMPALA/DS will simulate significantly faster a simple and repetitive TI than QS, but in  
249 such cases computation time is generally not a critical issue anyway.

250 A discussion on these questions will be included in the revised manuscript.

251 **Some of the figures and tables in Appendix A should be excluded unless they are discussed**  
252 **and references in the text.**

253 We will fix the missing references.

254

255 Response to Short Comment 1 (Executive editor of GMD Astrid Kerkweg)  
256

257 **Please add a version number for the QS in the title upon your revised submission to GMD.**

258 *As suggested we will add the adapted versioning identifier in the title of the manuscript.*
